# Supplementary material for: Percutaneous coronary intervention in calcified stenoses: a protocol for a systematic review with meta-analysis, trial sequential analysis and network meta-analysis
Source: HighWire-hosted journal article supplement (doi:10.1136/bmjopen-2022-063884), 2022-09-01
Supplement: bmjopen-2022-063884supp001_data_supplement.pdf [file bmjopen-2022-063884supp001_data_supplement.pdf]

**Search strategies for  
Percutaneous coronary intervention in calcified stenoses  
(Andreas Torp Kristensen)  
Preliminary searches prepared 8 April 2022**

**Cochrane Central Register of Controlled Trials (latest issue) in the Cochrane Library**

- #1 MeSH descriptor: [Coronary Artery Disease] explode all trees
- #2 MeSH descriptor: [Myocardial Infarction] explode all trees
- #3 MeSH descriptor: [Coronary Stenosis] explode all trees
- #4 (coronar\* or myocardial infarct\* or angina or arteriosclero\* or STEMI or (left next ma in) or stenosis\* or ischemic heart disease\*)
- #5 #1 or #2 or #3 or #4
- #6 MeSH descriptor: [Calcinosis] this term only
- #7 MeSH descriptor: [Vascular Calcification] explode all trees
- #8 (calcif\* or calcinos\*)
- #9 #6 or #7 or #8
- #10 MeSH descriptor: [Coronary Angiography] explode all trees
- #11 MeSH descriptor: [Percutaneous Coronary Intervention] explode all trees
- #12 MeSH descriptor: [Angioplasty, Balloon, Coronary] explode all trees
- #13 MeSH descriptor: [Atherectomy, Coronary] explode all trees
- #14 (angiogra\* or arterygra\* or coronarygra\* or percutaneous coronary intervention or lesion preparation or predilat\* or postdilat\* or stent\* or angioplast\* or atherectom\* or balloon\*)
- #15 #10 or #11 or #12 or #13 or #14
- #16 #5 and #9 and #14

**MEDLINE Ovid (1946 to the date of the search)**

1. exp Coronary Artery Disease/
2. exp Myocardial Infarction/
3. exp Coronary Stenosis/
4. (coronar\* or myocardial infarct\* or angina or arteriosclero\* or STEMI or (left adj main) or stenosis\* or ischemic heart disease\*).mp. [mp=title, abstract, original title, name of substance word, subject heading word, floating sub-heading word, keyword heading word, organism supplementary concept word, protocol supplementary concept word, rare disease supplementary concept word, unique identifier, synonyms]
5. 1 or 2 or 3 or 4
6. Calcinosis/
7. exp Vascular Calcification/
8. (calcif\* or calcinos\*).mp. [mp=title, abstract, original title, name of substance word, subject heading word, floating sub-heading word, keyword heading word, organism supplementary concept word, protocol supplementary concept word, rare disease supplementary concept word, unique identifier, synonyms]
9. 6 or 7 or 8
10. exp Coronary Angiography/
11. exp Percutaneous Coronary Intervention/
12. exp Angioplasty, Balloon, Coronary/
13. exp Atherectomy, Coronary/
14. (angiogra\* or arterygra\* or coronarygra\* or percutaneous coronary intervention or lesion preparation or predilat\* or postdilat\* or stent\* or angioplast\* or atherectom\* or balloon\*).mp. [mp=title, abstract, original title, name of substance word, subject heading word, floating sub-heading word, keyword heading word, organism supplementary concept word, protocol supplementary concept word, rare disease supplementary concept word, unique identifier, synonyms]
15. 10 or 11 or 12 or 13 or 14
16. 5 and 9 and 14
17. (randomized controlled trial or controlled clinical trial or retracted publication or retraction of publication).pt. or clinical trials as topic.sh. or trial.ti.
18. (random\* or blind\* or placebo\*).mp. [mp=title, abstract, original title, name of substance word, subject heading word, floating sub-heading word, keyword heading word, organism supplementary concept word, protocol supplementary concept word, rare disease supplementary concept word, unique identifier, synonyms]
19. 16 and (17 or 18)

**Embase Ovid (1974 to the date of the search)**

1. exp coronary artery disease/

2. exp heart infarction/
3. (coronar\* or myocardical infarct\* or angina or arteriosclero\* or STEMI or (left adj main) or stenosis\* or ischemic heart disease\*).mp. [mp=title, abstract, heading word, drug trade name, original title, device manufacturer, drug manufacturer, device trade name, keyword heading word, floating subheading word, candidate term word]
4. 1 or 2 or 3
5. exp calcification/
6. exp cardiovascular calcification/
7. (calcif\* or calcinos\*).mp. [mp=title, abstract, heading word, drug trade name, original title, device manufacturer, drug manufacturer, device trade name, keyword heading word, floating subheading word, candidate term word]
8. 5 or 6 or 7
9. exp coronary angiography/
10. exp percutaneous coronary intervention/
11. exp percutaneous transluminal angioplasty/
12. exp coronary atherectomy/
13. exp coronary artery surgery/
14. (angiogra\* or arterygra\* or coronarygra\* or percutaneous coronary intervention or lesion preparation or predilat\* or postdilat\* or stent\* or angioplast\* or atherectom\* or balloon\*).mp. [mp=title, abstract, heading word, drug trade name, original title, device manufacturer, drug manufacturer, device trade name, keyword heading word, floating subheading word, candidate term word]
15. 9 or 10 or 11 or 12 or 13 or 14
16. 4 and 8 and 15
17. Randomized controlled trial/ or Controlled clinical trial/ or retracted article/ or (erratum or tombstone).pt. or trial.ti. or yes.nr.
18. (random\* or blind\* or placebo\*).mp. [mp=title, abstract, heading word, drug trade name, original title, device manufacturer, drug manufacturer, device trade name, keyword heading word, floating subheading word, candidate term word]
19. 16 and (17 or 18)

**LILACS (Bireme; 1982 to the date of the search)**

(coronar\$ or myocardical infarct\$ or angina or arteriosclero\$ or STEMI or left main or stenosis\$ or ischemic heart disease\$) [Words] and (calcif\$ or calcinos\$) [Words] and (angiogra\$ or arterygra\$ or coronarygra\$ or percutaneous coronary intervention or lesion preparation or predilat\$ or postdilat\$ or stent\$ or angioplast\$ or atherectom\$ or balloon\$) [Words]

**Science Citation Index Expanded (1900 to the date of the search) and Conference Proceedings Citation Index – Science (1990 to the date of the search) (Web of Science)**

#6 #4 AND #5

#5 TI=(random\* or blind\* or placebo\* or trial\*) OR TS=(random\* or blind\* or placebo\*)

#4 #3 AND #2 AND #1

#3 TS=(angiogra\* or arterygra\* or coronarygra\* or percutaneous coronary intervention or lesion preparation or predilat\* or postdilat\* or stent\* or angioplast\* or atherectom\* or balloon\*)

#2 TS=(calcif\* or calcinos\*)

#1 TS=(coronar\* or myocardical infarct\* or angina or arteriosclero\* or STEMI or left NEXT main or stenosis\* or ischemic heart disease\*)
